# Supplementary material
Source: PubMed Central journal article supplement (PMC7969387)
Supplement: NIHMS1654659-supplement-Supplemental_Table_1.pdf [file NIHMS1654659-supplement-Supplemental_Table_1.pdf]

| <i>Supplemental Table 1. Kidney Disease Improving Global Outcomes (KDIGO) creatinine criteria*</i> |                                                                                                                                     |
|----------------------------------------------------------------------------------------------------|-------------------------------------------------------------------------------------------------------------------------------------|
| Stage 1                                                                                            | 1.5–1.9 times baseline which is known or presumed to have occurred within the prior 7 days<br>OR<br>≥0.3 mg/dL increase within 48 h |
| Stage 2                                                                                            | 2.0–2.9 times baseline                                                                                                              |
| Stage 3                                                                                            | 3.0 times baseline<br>OR<br>Increase in serum creatinine to ≥4.0 mg/dl<br>OR<br>Initiation of renal replacement therapy             |

*\*Obtained and adapted from: Khwaja A. KDIGO clinical practice guidelines for acute kidney injury. Nephron Clin Pract. 2012;120(4):c179-84.*
