# Supplementary material
Source: PubMed Central journal article supplement (PMC7969387)
Supplement: NIHMS1654659-supplement-Supplemental_Table_2.pdf [file NIHMS1654659-supplement-Supplemental_Table_2.pdf]

Supplemental Table 2 – Hospital outcomes according to preoperative anemia status and sex\*

|                                 | Males            |                 |                               |         | Females          |                 |                               |         |
|---------------------------------|------------------|-----------------|-------------------------------|---------|------------------|-----------------|-------------------------------|---------|
|                                 | None<br>(N=1534) | Mild<br>(N=719) | Moderate/<br>Severe<br>(N=77) | P-value | None<br>(N=1349) | Mild<br>(N=373) | Moderate/<br>Severe<br>(N=65) | P-value |
| Acute kidney injury (AKI)       | 179 (11.7%)      | 148 (20.6%)     | 17 (22.1%)                    | <.001   | 39 (2.9%)        | 40 (10.7%)      | 14 (21.5%)                    | <.001   |
| AKI stage                       |                  |                 |                               | <.001   |                  |                 |                               | <.001   |
| None                            | 1355 (88.3%)     | 571 (79.4%)     | 60 (77.9%)                    |         | 1310 (97.1%)     | 333 (89.3%)     | 51 (78.5%)                    |         |
| 1                               | 130 (8.5%)       | 94 (13.1%)      | 7 (9.1%)                      |         | 29 (2.1%)        | 25 (6.7%)       | 8 (12.3%)                     |         |
| 2                               | 38 (2.5%)        | 35 (4.9%)       | 6 (7.8%)                      |         | 8 (0.6%)         | 9 (2.4%)        | 2 (3.1%)                      |         |
| 3                               | 11 (0.7%)        | 19 (2.6%)       | 4 (5.2%)                      |         | 2 (0.1%)         | 6 (1.6%)        | 4 (6.2%)                      |         |
| Any perioperative RBCs          | 473 (31%)        | 517 (72%)       | 77 (100%)                     | <.001   | 693 (51%)        | 332 (89%)       | 61 (94%)                      | <.001   |
| Return to OR                    | 240 (15.6%)      | 120 (16.7%)     | 13 (16.9%)                    | 0.802   | 197 (14.6%)      | 85 (22.8%)      | 14 (21.5%)                    | <.001   |
| Vascular complications†         | 63 (4.1%)        | 44 (6.1%)       | 6 (7.8%)                      | 0.055   | 36 (2.7%)        | 15 (4.0%)       | 2 (3.1%)                      | 0.394   |
| ICU length of stay, days        | 1.0 (0.9, 1.3)   | 1.1 (0.9, 2.0)  | 1.1 (1.0, 2.0)                | <.001   | 1.1 (0.9, 1.9)   | 1.1 (1.0, 2.0)  | 1.1 (1.0, 3.0)                | 0.003   |
| Hospital length of stay, days   | 5.8 (4.8, 6.8)   | 6.7 (5.7, 7.9)  | 6.5 (5.5, 8.0)                | <.001   | 6.3 (5.6, 7.7)   | 6.8 (5.7, 8.6)  | 7.7 (5.8, 13.0)               | <.001   |
| Hospital mortality              | 3 (0.20%)        | 2 (0.28%)       | 0 (0%)                        | 0.849   | 1 (0.07%)        | 2 (0.54%)       | 0 (0%)                        | 0.147   |
| Hospital readmit within 30 days | 95 (6.2%)        | 52 (7.2%)       | 8 (10.4%)                     | 0.267   | 84 (6.2%)        | 34 (9.1%)       | 8 (12.3%)                     | 0.038   |
| Estimated blood loss, mL        | 1000 (710, 1350) | 952 (612, 1304) | 1000 (728, 1400)              | 0.018   | 905 (624, 1200)  | 900 (571, 1232) | 1033 (718, 1626)              | 0.033   |

\* Values are number (percent) and median (Q1, Q3) for categorical variables and continuous variables respectively. Less than 1% of patients were missing estimated blood loss. P-values are from Kruskal-Wallis tests for continuous outcomes and Pearson chi-square tests for categorical outcomes.

† Vascular complications included myocardial infarction, pulmonary embolism, and stroke.
